# Supplementary material for: Fungal Histidine Phosphotransferase Plays a Crucial Role in Photomorphogenesis and Pathogenesis in Magnaporthe oryzae
Source: PubMed Central journal article supplement (PMC5437211; doi:10.3389/fchem.2017.00031), 2017-05-19

## **Supplementary Information:**

**Supplementary Table S1: List of oligonucleotide primers used in this study.**

**Supplementary Figure 1: Light-induced *YPD1* isoform in *M. oryzae*.** **A)** Nucleotide sequences of the *YPD1* cDNAs obtained from *M. oryzae* culture grown under photo-illumination. The extra stretch of nucleotide at the N-terminus of the T0 isoform is underlined. **B)** Phosphorylation sites predicted in the *YPD1* sequences in *M. oryzae*. Asterisks show additional potential phosphorylation sites in the T0 isoform when compared to those in the T1 variant.

**Supplementary Figure 2: Ypd1 plays an important role in stress response in *M. oryzae*.** **A)** Western blot analysis showing expression of Ypd1 under indicated stress condition (left panels). Total protein was extracted from *M. oryzae* cultures grown in liquid CM for 3 days followed by a treatment with or without the indicated compound for 6 h. Purified *E. coli*-produced recombinant Ypd1 was used as a positive control ((+) ve; right panels). Ypd1 was detected using the anti-Ypd1 antibody. The blot was stained with Ponceau S to confirm normalization of protein samples. **B)** Sensitivity of the indicated *M. oryzae* strains towards different stress conditions. Vegetative growth of the WT or YPD1 KD mutants grown on YEG with or without the indicated compound was assessed and photographed after 8 dpi.

**Supplementary Table S1:**

| <b>Name of the primer</b> | <b>Sequence of the primer</b>              |
|---------------------------|--------------------------------------------|
| YPD1F                     | 5' ATGGTACCGTACGGTTGTTTGATGTCCG 3'         |
| YPD1R                     | 5' ATGGATCCAGCCTGTCTTTCGTTTGAAG 3'         |
| YPD1 OF                   | 5' ATGGGCCCTAAGCTTGTATTGCCTAGAGCAGTCCGA 3' |
| YPD1 OR                   | 5' ACGGGCCCTAAGCTTGTCTCCATATCCTTCTTG 3'    |
| YPD1 cDNA F               | 5' CGACATATGCAGTCCGATTCCGAAGAAAAC 3'       |
| YPD1 cDNA R               | 5' CTCTCGAGAAGATCGATCACGAAAACTCATTGAG 3'   |
| T0YPD1F                   | 5' ATGTACTCTGTAAAGGACTC 3'                 |
| T1YPD1F                   | 5' ATGCCCGATTTTGGAGCCCA 3'                 |
| T1T0YPD1R                 | 5' CTAAGGATCGATCACGAAAA 3'                 |
| YPD1q F                   | 5' AAGGGTTCATCCGCCACT 3'                   |
| YPD1qR                    | 5' ATAGCACACATCCTCGCTTG 3'                 |
| TUBqF                     | 5' GAGTCCAACATGAACGATCT 3'                 |
| TUBqR                     | 5' GTACTCCTCTTCTCCTCGT 3'                  |
| MGG_01342qF               | 5' TTTGGCCGGCAAGTCAACGGAA 3'               |
| MGG_01342qR               | 5' AATCCCTCGGCGGTTTTCAGCT 3'               |
| MGG_13891qF               | 5' ACTTCGCAAAGCCGGATGCA 3'                 |
| MGG_13891qR               | 5' ATTACCGACAGCCGCACGTT 3'                 |
| MGG_11882qF               | 5' ACATTCGCTTGCCACCTTGCA 3'                |
| MGG_11882qR               | 5' AAATCGGGGTTGCGCTTCTGGA 3'               |
| MGG_12377qF               | 5' AGCGCAAAGGCATTGGCTACGA 3'               |
| MGG_12377qR               | 5' TGCGATGTGTGTTGGACAGCGT 3'               |
| MGG_01227qF               | 5' ATTTGAACGGAGCATCGCCGCA 3'               |
| MGG_01227qR               | 5' TTGTTGCCGCACCTGACAAGCT 3'               |
| MGG_02665qF               | 5' ACCAACAGGTCACGCGACGAAT 3'               |
| MGG_02665qR               | 5' TGCAATCCCGTTGTGGCTACTG 3'               |

Supplementary Figure S1:

A

*YPD1* isoform T1 (408 nt):

```
ATGCCCGATTTTGGAGCCCATGTGCGACAGCACGACGTTTCGAACAGATCCTGGAAA
TGGACGAAGATGAGGCCGAAAGGGATTTTCAGCAAACCTTTAGTCATGGGATTCTT
TGAACAAGCAGAGGAGACTTTTAAAAAATGGACAAGGCCCTGAAAGATCGTGA
CTTGAAAGAGCTTTTCGAGCCTTGGCCACTTCCTCAAGGGTTCATCCGCCACTCTG
GGCTTTACAAAGGTCAAGGACAGCTGCCAAGTGATTCAACAGTACGGAAACAAG
CTGAAACTAGACGGCACTGAGGAGCCAAGCGAGGATGTGTGCTATGAGAAGATC
GATAAAGCACTTGTGGATGCCAAGAAGGATATGGAGAGTTTGAAGAACTTCTCA
ATGAGTTTTTCGTGATCGATCCTTAG
```

*YPD1* isoform T0 (462 nt):

```
ATGTACTCTGTAAAGGACTCTGAAAAGTCCGATTCCGAAGAAAACGCCGACAAGATGCC
CGATTTTGGAGCCCATGTGCGACAGCACGACGTTTCGAACAGATCCTGGAAATGGACGAAG
ATGAGGCCGAAAGGGATTTTCAGCAAACCTTTAGTCATGGGATTCTTTGAACAAGCAGAG
GAGACTTTTAAAAAATGGACAAGGCCCTGAAAGATCGTGACTTGAAGAGCTTTTCGAG
CCTTGGCCACTTCCTCAAGGGTTCATCCGCCACTCTGGGCTTTACAAAGGTCAAGGACA
GCTGCCAAGTGATTCAACAGTACGGAAACAAGCTGAAACTAGACGGCACTGAGGAGCC
AAGCGAGGATGTGTGCTATGAGAAGATCGATAAAGCACTTGTGGATGCCAAGAAGGATA
TGGAGAGTTTGAAGAACTTCTCAATGAGTTTTTCGTGATCGATCCTTAG
```

B

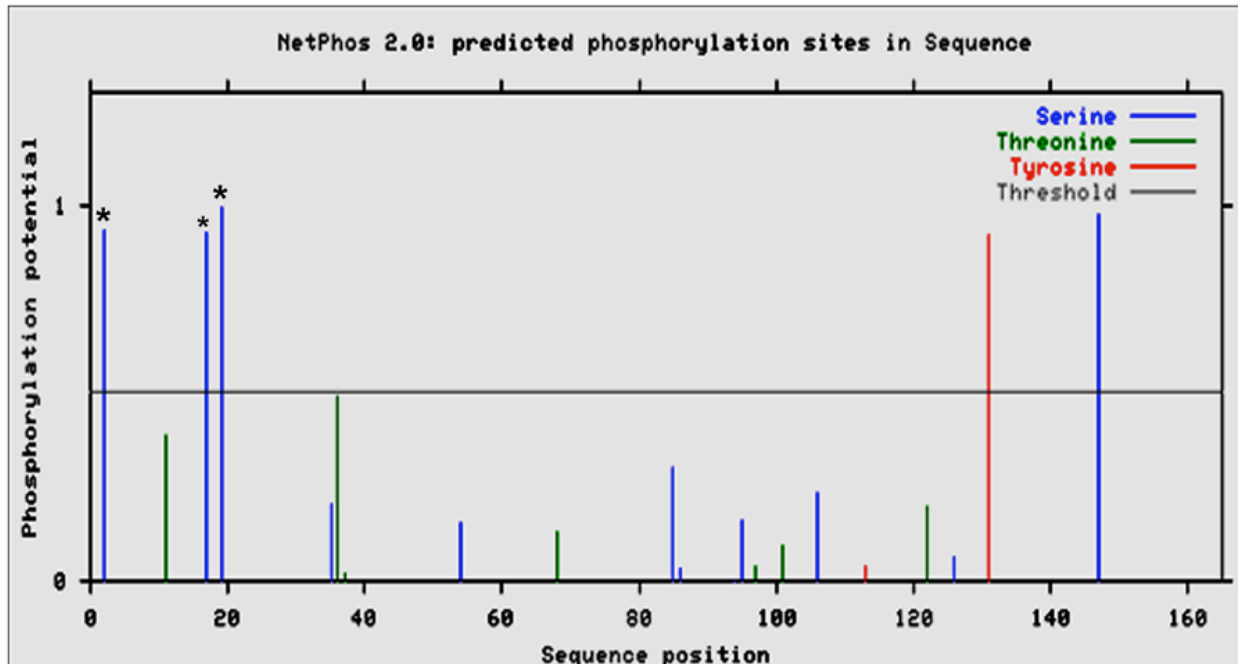

Supplementary Figure S2:

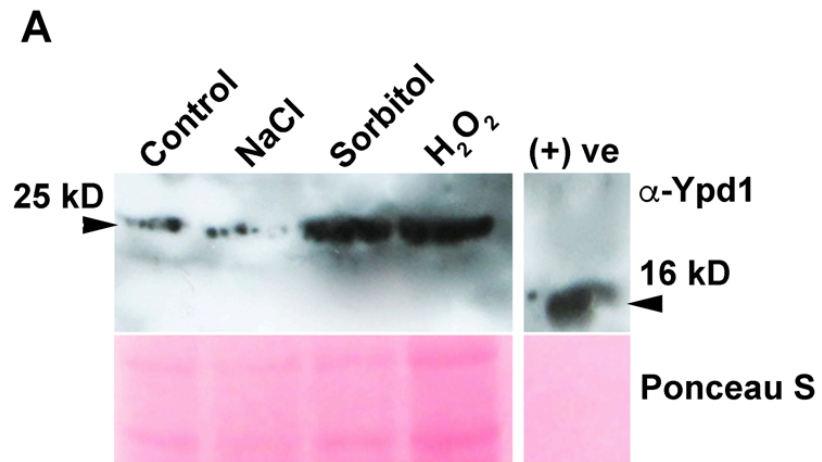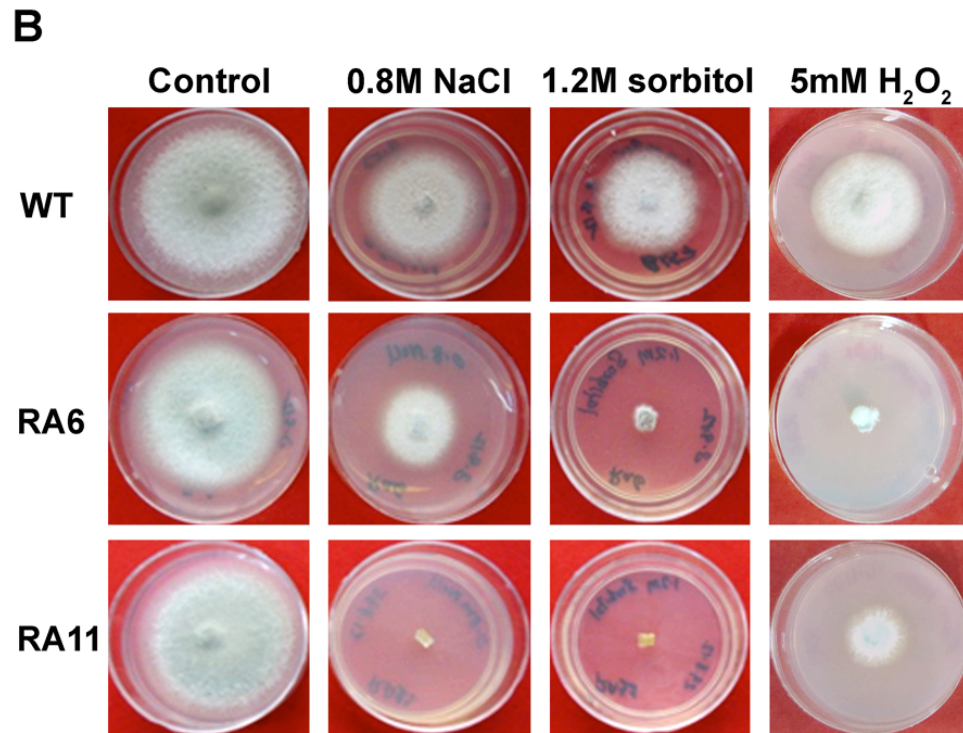

Supplement: Presentation1.pdf [file Presentation1.pdf]
